## PAIN & AGING SECTION

# Life Stressors: Elevations and Disparities Among Older Adults with Pain

Penny L. Brennan , PhD

Institute for Health & Aging, University of California, San Francisco, San Francisco, California, USA

*Correspondence to:* Penny Brennan, PhD, Institute for Health & Aging, University of California, San Francisco, 3333 California Street, Suite 340, San Francisco, CA 94118-0646, USA. E-mail: penny.brennan@ucsf.edu.

*Funding sources:* This work was supported by grants from the National Institutes of Health, National Institute on Aging (R21AG053593), and National Institute on Alcohol Abuse and Alcoholism (R01AA15685).

*Conflicts of interest:* The author has no conflicts of interest to report.

### Abstract

**Objective.** To examine stressor elevations among older adults with pain, and gender and race disparities in the dual burdens of late-life pain and stressors. **Design.** Cross-sectional. **Setting.** Community. **Subjects.** Participants in the Longitudinal Late-Life Health study (LLLH; N = 1,884) and the Health and Retirement Study (HRS; N = 7,704). **Methods.** Pain and stressor measures were harmonized across the LLLH and HRS samples. Analyses of covariance were conducted to determine the effects of older adults' pain, gender, race, and interactions between these factors, on their stressors in nine separate life domains, and in stressors overall. **Results.** In both the LLLH and HRS samples, older adults with painful conditions (joint, back, headache, chest pain), more numerous painful conditions, more severe pain, and more pain interference had elevated stressors in all life domains, compared with older adults without or with less serious pain. Pain was more prevalent among women and nonwhites than men and whites. Stressor exposure was higher for men than women in most life domains; it was higher for nonwhites than whites in all life domains. For certain types of pain and life domains, pain and gender, as well as pain and race, interacted to predict stressor elevations. **Conclusions.** Late-life pain is associated with elevations in stressors, and there are gender and race disparities in the dual burdens of heightened pain and elevated stressors in later life. Pain and stressors are not consistently more strongly linked among older women than older men, or among older nonwhite than older white persons.

**Key Words:** Stressors; Pain; Older Adults; Gender; Race

### Introduction

Pain is common in later life. Between 55% and 66% of late-middle-aged and older adults affirm four-week prevalence of pain [1,2]; 72% to 86% of older adults report having had pain in the last year [3–5]. Chronic and other forms of pain may increase, or reach peak levels, during later life [6–8]. The high prevalence of pain and its associated personal, social, and economic costs are expected to grow given the swelling ranks of post–World War II “baby boom” cohorts. Accordingly, it is important to further research aimed at the prediction, prevention, and effective treatment of late-life pain [9–11].

The biopsychosocial model of pain posits that pain is a product of complex interactions among biological, psychological, and social factors. This perspective has informed most pain research of the last 50 years [12–15]. Historically, however, pain research has devoted unequal attention to the three components of the biopsychosocial model of pain; biological factors have received the most research attention, followed by psychological factors, and lastly by social factors [12,14,16,17].

Only a small body of research has focused on the social environmental determinants of pain. Positive prospective associations have been demonstrated between

traumatic experiences early in life and subsequent development of chronic and musculoskeletal pain [12,18–22]. Financial hardship and living in economically disadvantaged neighborhoods have been shown to be associated with poorer pain outcomes, including slower recovery from painful injuries and the development of chronic pain [23,24]. In general, social support provided by family members and friends contributes to positive pain-related outcomes, but one specific expression of social “support,” solicitousness, has been found to predict more pain-related disability [12,25]. Social relationships in the workplace and macro-level social factors related to workplace injuries (e.g., legislation and compensation systems) have been shown to influence workers’ pain outcomes, including back pain and pain-related disability due to injuries [12,17,26,27].

In several of these studies, the explanatory factor for poorer pain outcomes was conceived to be “stress” [28], but this intrapersonal psychological and physiological experience, indicative of being taxed by environmental conditions [29,30], should be distinguished from *stressors*, the environmental events or circumstances that tax one’s functioning and well-being [29,31]. Research on the sociology of health has substantiated that stressor elevations are associated with negative health outcomes across a range of major conditions, including cardiovascular illness, rheumatoid arthritis, cancers, and depressive symptoms, among people of all ages [29,32–34]. Thus, one might expect to find a positive association between stressors and pain. However, it appears no research has examined the relationship between life stressors and pain among older adults.

Research on the sociology of health also has shown that stressor exposures and poorer health outcomes are unequally distributed in the population, varying by demographic factors, including gender and race [34,35], and that vulnerability to poorer health outcomes as a result of stressor exposure varies by gender and race [36–38]. Accordingly, gender and race are important factors to consider in examining pain and stressors among older adults.

With respect to pain, studies of mixed-age and older samples have shown that women have more pain-related medical conditions, such as musculoskeletal disorders, headaches, fibromyalgia, and widespread pain, than do men. However, there is inconsistent evidence regarding gender differences in pain severity and pain interference [39–43]. Studies of mixed-age samples generally show that prevalence rates of chronic pain and pain-related medical conditions are higher among whites than nonwhites, though there is mixed evidence for race-related differences in pain frequency, intensity, and interference [44–46].

With respect to stressor exposure, gender differences have been reported, but they occur only within specific stressor domains rather than globally (i.e., as reflected in overall composite stressor measure scores [47]. For

example, McDonough and Walters [37] found that, compared with men, women experienced more stressors in the domains of social life, work life, children, and family health, but had fewer stressors in the domain of finances. Similarly, McLeod and associates [36] reported that women had more stressors involving illness and death of close family members, friends, and pets than did men, but they were less likely to report stressors involving victimization and finances.

Little research has addressed whether nonwhites have higher stressor exposures than do whites. In a 2007 review of the literature, Hatch and Dohwenrend [47] concluded that exposure to negative life events is higher among African Americans and other racial/ethnic minorities than among majority whites. Consistent with this, Sternthal and colleagues [38] found a higher overall number of stressors among African Americans and Hispanics than among non-Hispanic whites. These stressor exposure differences held across a variety of life domains including early-life trauma, negative life events, finances, interpersonal relationships, and neighborhood/community.

The differential stressor vulnerability hypothesis [48,49] suggests that the strength of the association between stressors and poor health outcomes, such as chronic medical conditions and psychological distress, is stronger among women than men and among nonwhites compared with whites. As concerns gender, there is some support for this hypothesis: Stressors and negative health outcomes are sometimes more strongly associated for women than for men (e.g., [36,37,50,51]), but these differential, gender-related associations are found only in certain life domains and for certain health outcomes [48]. Regarding race, Sternthal and associates [38] found no evidence to support the differential vulnerability hypothesis.

In sum, no contemporary theoretical models feature physical and social environmental factors, including stressors, as important correlates of late-life pain. To further such models, this investigation examines data from two large, existing studies of health and aging in order to establish that late-life pain and stressors are linked, to determine whether late-life pain and stressors are unequally distributed by gender and by race, and to test the proposition that, whereas pain and stressors are linked for all older adults, older women and older nonwhite adults with pain are especially likely to experience stressor elevations. By inference, previous research findings suggest the following predictions: 1) older adults with various types of pain (back, joint, headache, chest), more numerous painful conditions, more severe pain, and pain interference will have elevated stressors in multiple life domains, and overall, compared with older adults with no or less serious pain; 2) there will be gender- and race-related disparities in the distributions of older adults’ pain and stressors; specifically, a) pain will be more prevalent among older women than older men; older women

will differ from older men in their stressor exposures, though this will vary by life domain; and b) both pain and stressors will be elevated among older nonwhites compared with older whites; and 3) pain will interact with gender and race to predict stressor elevations. Specifically, pain will be associated with stressor elevations among all older participants, but especially among older women and among older nonwhite adults.

These predictions were tested in two separate, large community samples of older adults in which pain and stressors were assessed using identical or very similar measures. This provided an opportunity to harmonize the pain and stressor measures across the two samples, then to determine whether relationships between pain and stressors found in one of the samples could be reproduced in the other. Such reproduction across harmonized data sets can increase confidence in study findings.

## Method

### Samples

The samples for this investigation were drawn from two parent investigations of aging and health: Longitudinal Late-Life Health (LLLH) and the Health and Retirement Study (HRS).

The LLLH was a 20-year longitudinal study of 1,884 late-middle-aged community residents from Northern California. Data for this investigation were collected through mailed surveys and interviews, for a total of six waves of data collection, the first beginning in 1986–1988 and the last occurring in 2006–2008. At baseline assessment, LLLH participants were between the ages of 55 and 65, almost 90% white, and comparable to similarly aged national community samples with respect to health characteristics (for further details on the LLLH baseline sample, see [52,53]).

For the present investigation, data from two LLLH subsamples were analyzed: a) the overall baseline sample of 1,884 individuals, from whom information was obtained about presence of joint, back, headache, and chest pain, but not about pain severity and pain interference, and b) a subsample of 690 of the original 1,884 participants who, seven years after baseline assessment, provided for the first time information about their pain severity and pain interference.

The Health and Retirement Study (HRS) has conducted longitudinal biennial health assessments (“core interviews”) of nationally representative samples of adults age 50+ since 1992 [54–56]. In 2006, the HRS began for the first time to collect psychosocial data from study participants, including information about their stressors in the domains of childhood/adolescent trauma, neighborhood environment, work, finances, and interpersonal relationships with spouses, children, extended family members, and friends [57]. The HRS sample for this investigation comprises the 7,703 older adults who

completed the 2006 HRS psychosocial questionnaire; all of these participants also had completed the 2006 HRS core interview (for further details regarding the HRS design and measures, see [55,56]).

### Measures

#### Demographic Characteristics

In both the LLLH and HRS samples, baseline measures of demographic characteristics included age, in years, and gender (0 = male, 1 = female). The LLLH and HRS samples were predominately white (91% and 83%, respectively). Due to this very skewed distribution, race was dichotomized as 0 = white, 1 = nonwhite.

#### Pain

In both the LLLH and HRS samples, participants were assessed for presence (0 = no, 1 = yes) of each of four types of pain: joint, back, headache, and chest pain; number of painful conditions was a count of these painful conditions, categorized as 1 = none or only one and 2 = two or more. In the LLLH study, pain severity and pain interference were assessed with two SF-12 Health Survey items [58]: “How much bodily pain have you had in the past month?” (rated 0 = none to 5 = very severe) and “During the past month, how much did pain interfere with your normal activities (including activities inside and outside your home)?” (rated 0 = not at all to 4 = extremely). In the HRS study, pain severity was rated on a scale of 0 (none) to 3 (severe), and pain interference was assessed with a single item asking participants whether their pain made it difficult for them to engage in their usual activities (0 = no, 1 = yes). To make the LLLH and HRS measures of pain severity commensurate, they were dichotomized: low pain severity = 0 (no to mild pain); high pain severity = 1 (moderate to very severe pain). To make the pain interference measures commensurate, the LLLH measure of pain interference was dichotomized as 0 = no and 1 = yes.

#### Life Stressors

A measure of negative life events was not available in the HRS data. However, given the historical importance of using measures of negative life events to predict health-related outcomes, this measure was used in the present study. In the LLLH sample, negative life events were measured using the Life Stressors and Social Resources Inventory (LISRES [59,60]), which is a count of 33 possible non-health-related negative events (e.g., death of a loved one, moving, having a car or home burglarized) that had occurred in the past year. Negative, health-related events were excluded from this measure because of their potential overlap with the pain measures used in this study.

In the LLLH sample, early-life trauma was measured by a count of eight items (e.g., school, legal, work, interpersonal problems) from the early-life section of Lemke

and associates' [61] life history of stressors inventory. In the HRS sample, it was measured by a count of four items (school, legal problems, parental addiction, physical abuse) from Krause and colleagues' measure of lifetime trauma before age 18 [62].

In the LLLH sample, neighborhood stressors were assessed by four LISRES items (e.g., houses maintained, streets clean); in the HRS sample, they were assessed with five items (e.g., area clean, safe to walk) from the Mendes de Leon et al. [63] measure of neighborhood disorder. In the LLLH sample, work stressors were assessed with three LISRES items (work pressure, rushed work, unpleasant physical work conditions), and in the HRS with three items (work pressure, work fast, and physically demanding work [57]). Financial stressors were assessed in the LLLH sample with six items from the LISRES (e.g., sufficient money for medical care, entertainment, a large unexpected bill), and in the HRS study they were assessed with the Campbell et al. [64] measure of financial strain, the answer to the question "How difficult is it for you to meet your monthly payments?" rated on a scale of 0 = not at all to 4 = very difficult.

In both the LLLH and HRS samples, chronic interpersonal stressors were assessed with six LISRES items (e.g., lack of empathy, critical, disappointing), within four life domains (spouse, children, extended family, and friends). In both samples, a composite measure of overall stressors was calculated by summing participants' stressor scores across the domains of neighborhood, work, finances, and interpersonal stressors involving spouse, extended family, and friends, then dividing the sum by the number of non-missing domains (e.g., some participants did not complete the work stressor section of the LISRES because they were retired; some were not partnered due to divorce or widowhood, so they did not complete the spouse section of the LISRES). In both the LLLH and HRS samples, the individual stressor domain measures were only moderately intercorrelated; these measures have good reliability and validity [52,57,59–61].

### Statistical Analyses

First, descriptive statistics were used to determine the demographic and pain characteristics of the LLLH and HRS samples. Next, analyses of covariance were conducted to compare mean stressor levels of participants: a) with and without joint, back, headache, and chest pain, b) with lower and higher numbers of painful conditions, c) with lower and higher levels of pain severity, and d) with and without pain interference, after statistically adjusting for age, gender, and race. These demographic factors were chosen as covariates because of their known associations with both stressors and pain. Next, analyses of covariance were conducted to determine the main effects of pain characteristics and gender, and interactions between them, on participants' overall stressors, after statistically adjusting for age and race. The same

**Table 1.** Demographic and pain characteristics of the LLLH and HRS samples

|                             | LLLH<br>M (SD) or % | HRS<br>M (SD) or % |
|-----------------------------|---------------------|--------------------|
| Demographic characteristics |                     |                    |
| Age, y                      | 61.4 (3.2)          | 67.6 (10.7)        |
| Female                      | 37.3                | 58.8               |
| Nonwhite                    | 9.4                 | 17.2               |
| Pain characteristics        |                     |                    |
| Joint pain                  | 48.7                | 60.1               |
| Back pain                   | 37.6                | 37.1               |
| Headache pain               | 15.6                | 10.3               |
| Chest pain                  | 20.4                | 5.8                |
| No. of painful conditions   |                     |                    |
| 0                           | 30.9                | 29.0               |
| 1                           | 32.4                | 37.3               |
| 2+                          | 36.6                | 33.7               |
| Pain severity               |                     |                    |
| Lower                       | 60.3                | 75.6               |
| Higher                      | 39.7                | 24.4               |
| Pain interference           | 55.6                | 21.7               |

For pain severity: lower = no or mild pain; higher = moderate to very severe pain.

LLLH = Longitudinal Late-Life Health study; HRS = Health and Retirement Study.

analyses were conducted to determine the main and interactive effects of pain characteristics and race on participants' overall stressors, after statistically adjusting for age and gender. Finally, subsidiary analyses of covariance were conducted to determine interactions of pain and gender, and pain and race, on stressors within each of nine separate stressor domains (negative life events, early-life trauma, neighborhood, work, finances, spouse, children, extended family, and friends), after statistically adjusting for relevant demographic factors. All of the analyses were conducted using SPSS 26 statistical software.

## Results

### Sample Characteristics

Table 1 shows the demographic and pain characteristics of the LLLH and HRS samples. Compared with the LLLH sample, the HRS sample was somewhat older (61 vs 68 years) and comprised more women (37% vs 59%) and nonwhite (9% vs 17%) participants.

Joint pain was common in both samples (49% and 60%, respectively), as was back pain (about 37%). Between 10% and 16% of participants reported headache pain. Chest pain was reported by about 20% of the LLLH sample and 6% of the HRS sample. In both samples, about 30% of participants had none of these painful conditions; 32% of the LLLH sample and 37% of the HRS sample had only 1 of them. About 37% of the LLLH sample and 34% of the HRS sample had 2 or more of the painful conditions.

Almost 40% of participants in the LLLH sample experienced higher levels of pain severity; this was true for



about 24% of the HRS sample. Pain interference occurred for over half of the LLLH sample and about 22% of the HRS sample.

### Stressors by Type of Painful Condition

Table 2 compares stressor levels, in multiple life domains, of participants with joint, back, headache, and chest pain, with those of participants reporting none of these types of pain, statistically adjusting for age, gender, and race, in the LLLH and HRS samples. Negative life events were not measured in the HRS sample, but in the LLLH sample participants who had joint, back, headache, and chest pain had almost twice as many non-health-related negative life events, such as death of a loved one, loss of job, or an accident during the past 12 months, as participants who experienced none of these types of pain.

Levels of early-life trauma, which included death of someone close, problems at school, and serious interpersonal problems during adolescence, were elevated among participants in the LLLH sample who had joint, back, headache, and chest pain, compared with participants who were free of all of these types of pain. In the HRS sample, levels of early-life trauma, which included school or legal problems, parental addiction, or physical abuse before the age of 18, were significantly elevated among participants with joint, back, headache, and chest pain relative to participants who had none of these types of pain.

Similarly, in both the LLLH and HRS samples, participants with each of these four types of painful conditions reported elevated neighborhood stressors, such as unclean streets, unsafe walking conditions, and problems with neighbors, as compared with participants without back, joint, headache, or chest pain. With the exception of participants in the HRS who reported chest pain, participants in both the LLLH and HRS samples who reported having back, joint, headache, and chest pain had significantly higher levels of work stressors, which included pressured and unpleasant physical work conditions, compared with participants free of these painful conditions.

In addition, in both samples, participants with joint, back, headache, and chest pain had significantly more financial stressors than those without these types of pain. They also had significant elevations in chronic interpersonal stressors in the domains of spouse, children, extended family, and friends and higher scores on the composite measure of overall stressors.

### Stressors by Number of Painful Conditions, Pain Severity, and Pain Interference

Table 3 compares the stressors of participants with lower and higher levels of number of painful conditions and pain severity and the stressors of participants with and without pain interference, after statistically adjusting for age, gender, and race. In both the LLLH and HRS

samples, across stressor domains, participants with two or more painful conditions had more stressors than did participants with no or only one painful condition.

In the LLLH sample, participants' negative life events, early-life trauma, neighborhood stressors, and work stressors were not measured during the data collection wave at which their pain severity and pain interference were assessed, so stressors in these domains cannot be compared with those found in the HRS sample. However, in the HRS sample, stressors in the domains of early-life trauma, work, finances, spouse, children, extended family, and friends, and overall, were all elevated among participants with higher compared with lower levels of pain severity. Moreover, stressors in all of these domains were higher among people who reported that pain was interfering with their daily activities and sleep than among those without pain interference.

For the stressor domains of finances, chronic interpersonal stressors involving spouses, children, extended family, and friends, and the overall composite measure of stressors, the HRS sample results reproduced those found in the LLLH sample. In each of these domains, stressors were higher among participants with higher compared with lower levels of pain severity and among those who experienced pain interference compared with those with no pain interference.

### Pain Characteristics, Gender, and Stressor Elevations

In the LLLH sample, women were more likely than men to have joint, back, and headache pain: 54% vs 46%, 40% vs 37%, and 18% vs 14%, respectively. However, chest pain was less prevalent among women than men: 18% vs 22%. Women also were more likely to have two or more painful conditions (40% vs 35%), higher levels of pain severity (43% vs 38%), and pain that interfered with their daily activities and sleep (59% vs 53%). Of these gender differences, those for prevalence of joint, headache, and chest pain and number of painful conditions were statistically significant ( $\chi^2 = 11.67$ ,  $P < 0.01$ ;  $\chi^2 = 5.15$ ,  $P < 0.01$ ;  $\chi^2 = 5.20$ ,  $P < 0.01$ ; and  $\chi^2 = 5.41$ ,  $P < 0.02$ , respectively).

A similar pattern of differences was found in the HRS sample. Women were more likely than men to have joint, back, and headache pain (65% vs 53%, 39% vs 34%, and 13% vs 7%, respectively) but about the same prevalence of chest pain (6%). Women were more likely to have two or more painful conditions (37% vs 29%), report higher levels of pain severity (28% vs 20%), and report that pain interfered with their daily activities and sleep (25% vs 18%). Except for chest pain prevalence, all of these group differences were statistically significant ( $\chi^2 = 122.78$ ,  $P < 0.01$ ;  $\chi^2 = 19.98$ ,  $P < 0.01$ ;  $\chi^2 = 80.98$ ,  $P < 0.01$ ;  $\chi^2 = 0.39$ ,  $P = 0.28$ ;  $\chi^2 = 62.37$ ,  $P < 0.01$ ;  $\chi^2 = 60.07$ ,  $P < 0.01$ ;  $\chi^2 = 49.23$ ,  $P < 0.01$ , respectively).

**Table 2.** Stressor levels among older adults with joint, back, headache, and chest pain, adjusting for age, gender, and race

| Joint Pain            |       |                 |              |        |         |       |                 |              |        |         |
|-----------------------|-------|-----------------|--------------|--------|---------|-------|-----------------|--------------|--------|---------|
| Stressor Domains      | LLLH  |                 |              |        |         | HRS   |                 |              |        |         |
|                       | N     | Without, M (SE) | With, M (SE) | F      | P Value | N     | Without, M (SE) | With, M (SE) | F      | P Value |
| Negative life events  | 1,437 | 2.13 (0.12)     | 3.73 (0.19)  | 120.61 | 0.000   | –     | –               | –            | –      | –       |
| Early-life trauma     | 1,438 | 0.34 (0.04)     | 0.47 (0.03)  | 5.94   | 0.015   | 6,867 | 0.26 (0.01)     | 0.35 (0.01)  | 34.80  | 0.000   |
| Neighborhood          | 1,418 | 1.88 (0.09)     | 2.55 (0.07)  | 38.26  | 0.000   | 6,643 | 6.84 (0.13)     | 8.10 (0.09)  | 64.13  | 0.000   |
| Work                  | 612   | 5.26 (0.18)     | 6.19 (0.15)  | 16.25  | 0.000   | 2,295 | 3.60 (0.06)     | 3.83 (0.06)  | 6.98   | 0.008   |
| Financial             | 1,435 | 3.33 (0.19)     | 4.94 (0.14)  | 46.75  | 0.000   | 6,723 | 0.83 (0.02)     | 1.07 (0.01)  | 92.37  | 0.000   |
| Chronic interpersonal |       |                 |              |        |         |       |                 |              |        |         |
| Spouse                | 1,130 | 5.69 (0.21)     | 6.72 (0.16)  | 15.79  | 0.000   | 4,718 | 4.63 (0.09)     | 5.12 (0.06)  | 21.53  | 0.000   |
| Child                 | 1,219 | 6.35 (0.20)     | 6.87 (0.15)  | 4.11   | 0.043   | 6,175 | 3.85 (0.08)     | 4.40 (0.05)  | 35.78  | 0.000   |
| Extended family       | 1,330 | 8.12 (0.18)     | 8.58 (0.14)  | 4.23   | 0.040   | 6,410 | 4.13 (0.07)     | 4.66 (0.05)  | 36.01  | 0.000   |
| Friends               | 1,435 | 6.69 (0.15)     | 7.30 (0.11)  | 11.22  | 0.001   | 6,273 | 3.35 (0.06)     | 3.70 (0.04)  | 23.03  | 0.000   |
| Overall stressors     | 1,426 | 5.33 (0.10)     | 6.20 (0.07)  | 51.69  | 0.000   | 6,669 | 3.92 (0.04)     | 4.50 (0.03)  | 112.61 | 0.000   |
| Back Pain             |       |                 |              |        |         |       |                 |              |        |         |
| Stressor Domains      | N     | Without, M (SE) | With, M (SE) | F      | P Value | N     | Without, M (SE) | With, M (SE) | F      | P Value |
| Negative life events  | 1,229 | 2.14 (0.12)     | 3.70 (0.10)  | 104.38 | 0.000   | –     | –               | –            | –      | –       |
| Early-life trauma     | 1,230 | 0.35 (0.04)     | 0.52 (0.04)  | 9.62   | 0.002   | 5,059 | 0.28 (0.01)     | 0.39 (0.01)  | 40.14  | 0.000   |
| Neighborhood          | 1,216 | 1.90 (0.08)     | 2.47 (0.07)  | 26.66  | 0.000   | 4,906 | 6.85 (0.12)     | 8.21 (0.11)  | 65.70  | 0.000   |
| Work                  | 542   | 5.27 (0.17)     | 6.19 (0.17)  | 14.68  | 0.000   | 1,919 | 3.68 (0.06)     | 3.90 (0.07)  | 5.91   | 0.015   |
| Financial             | 1,227 | 3.39 (0.19)     | 4.99 (0.16)  | 41.92  | 0.000   | 4,965 | 0.85 (0.02)     | 1.20 (0.02)  | 148.20 | 0.000   |
| Chronic interpersonal |       |                 |              |        |         |       |                 |              |        |         |
| Spouse                | 963   | 5.67 (0.21)     | 7.00 (0.18)  | 24.04  | 0.000   | 3,584 | 4.64 (0.08)     | 5.26 (0.08)  | 29.17  | 0.000   |
| Child                 | 1,041 | 6.38 (0.20)     | 7.17 (0.17)  | 8.76   | 0.003   | 4,526 | 4.01 (0.08)     | 4.76 (0.07)  | 52.91  | 0.000   |
| Extended family       | 1,145 | 8.16 (0.18)     | 8.96 (0.16)  | 11.05  | 0.001   | 4,750 | 4.26 (0.07)     | 4.97 (0.06)  | 52.82  | 0.000   |
| Friends               | 1,227 | 6.73 (0.15)     | 7.47 (0.12)  | 15.31  | 0.000   | 4,588 | 3.43 (0.06)     | 3.87 (0.05)  | 31.21  | 0.000   |
| Overall stressors     | 1,222 | 5.36 (0.10)     | 6.35 (0.08)  | 62.92  | 0.000   | 4,922 | 4.00 (0.04)     | 4.70 (0.04)  | 144.00 | 0.000   |
| Headache Pain         |       |                 |              |        |         |       |                 |              |        |         |
| Stressor Domains      | N     | Without, M (SE) | With, M (SE) | F      | P Value | N     | Without, M (SE) | With, M (SE) | F      | P Value |
| Negative life events  | 815   | 2.13 (0.11)     | 4.02 (0.15)  | 105.89 | 0.000   | –     | –               | –            | –      | –       |
| Early-life trauma     | 815   | 0.35 (0.04)     | 0.58 (0.06)  | 9.38   | 0.002   | 3,022 | 0.30 (0.01)     | 0.43 (0.02)  | 26.23  | 0.000   |
| Neighborhood          | 808   | 1.89 (0.09)     | 2.55 (0.12)  | 20.06  | 0.000   | 2,942 | 6.85 (0.12)     | 8.89 (0.21)  | 67.85  | 0.000   |
| Work                  | 373   | 5.27 (0.17)     | 6.62 (0.27)  | 18.30  | 0.000   | 1,335 | 3.70 (0.06)     | 4.07 (0.12)  | 7.68   | 0.006   |
| Financial             | 812   | 3.36 (0.18)     | 5.62 (0.24)  | 55.03  | 0.000   | 2,967 | 0.89 (0.02)     | 1.40 (0.004) | 157.49 | 0.050   |
| Chronic interpersonal |       |                 |              |        |         |       |                 |              |        |         |
| Spouse                | 636   | 5.70 (0.21)     | 7.30 (0.29)  | 19.72  | 0.000   | 2,218 | 4.67 (0.09)     | 5.55 (0.15)  | 24.90  | 0.000   |
| Child                 | 636   | 6.41 (0.20)     | 7.26 (0.27)  | 6.36   | 0.012   | 2,688 | 4.16 (0.08)     | 4.97 (0.13)  | 28.34  | 0.000   |
| Extended family       | 765   | 8.15 (0.18)     | 8.88 (0.24)  | 5.65   | 0.018   | 2,848 | 4.37 (0.07)     | 5.5 (0.13)   | 60.03  | 0.000   |
| Friends               | 814   | 6.71 (0.15)     | 7.59 (0.20)  | 12.27  | 0.000   | 2,729 | 3.45 (0.06)     | 4.05 (0.10)  | 23.29  | 0.000   |
| Overall stressors     | 808   | 5.36 (0.10)     | 6.59 (0.13)  | 59.92  | 0.000   | 2,953 | 4.06 (0.04)     | 5.08 (0.08)  | 135.73 | 0.000   |
| Chest Pain            |       |                 |              |        |         |       |                 |              |        |         |
| Stressor Domains      | N     | Without M (SE)  | With M (SE)  | F      | P Value | N     | Without M (SE)  | With M (SE)  | F      | P Value |
| Negative life events  | 905   | 2.11 (0.12)     | 4.71 (0.14)  | 211.35 | 0.000   | –     | –               | –            | –      | –       |
| Early-life trauma     | 905   | 0.34 (0.04)     | 0.52 (0.05)  | 7.06   | 0.008   | 2,678 | 0.29 (0.01)     | 0.42 (0.03)  | 18.10  | 0.000   |
| Neighborhood          | 895   | 1.88 (0.09)     | 2.67 (0.10)  | 36.43  | 0.000   | 2,605 | 6.88 (0.12)     | 9.04 (0.28)  | 49.93  | 0.000   |
| Work                  | 381   | 5.26 (0.17)     | 6.28 (0.26)  | 11.12  | 0.001   | 1,133 | 3.69 (0.06)     | 3.86 (0.22)  | 0.52   | 0.469   |
| Financial             | 903   | 3.37 (0.22)     | 6.39 (0.22)  | 107.45 | 0.000   | 2,626 | 0.86 (0.02)     | 1.38 (0.05)  | 109.75 | 0.000   |
| Chronic interpersonal |       |                 |              |        |         |       |                 |              |        |         |
| Spouse                | 697   | 5.62 (0.21)     | 7.55 (0.25)  | 35.29  | 0.000   | 1,951 | 4.63 (0.08)     | 5.44 (0.20)  | 13.69  | 0.000   |
| Child                 | 760   | 6.38 (0.21)     | 7.68 (0.24)  | 17.17  | 0.000   | 2,384 | 4.06 (0.08)     | 5.11 (0.17)  | 31.81  | 0.000   |
| Extended family       | 847   | 8.16 (0.18)     | 9.03 (0.21)  | 10.41  | 0.001   | 2,521 | 4.31 (0.07)     | 4.97 (0.16)  | 14.01  | 0.000   |
| Friends               | 903   | 6.76 (0.15)     | 8.01 (0.18)  | 29.80  | 0.000   | 2,443 | 3.48 (0.06)     | 3.79 (0.13)  | 4.52   | 0.034   |
| Overall stressors     | 895   | 5.35 (0.10)     | 6.91 (0.11)  | 111.24 | 0.000   | 2,611 | 4.03 (0.04)     | 4.94 (0.10)  | 72.51  | 0.000   |

For joint, back, headache, and chest pain: Without = does not have this or any of the other types of pain; With = has this type of pain.

LLLH = Longitudinal Late-Life Health study; HRS = Health and Retirement Study.

**Table 3.** Stressor levels among older adults by number of painful conditions, pain severity, and pain interference, adjusting for age, gender, and race

| Stressor Domains      | Number of Painful Conditions |               |                |        |         |       |               |                |        |         |
|-----------------------|------------------------------|---------------|----------------|--------|---------|-------|---------------|----------------|--------|---------|
|                       | LLLH                         |               |                |        |         | HRS   |               |                |        |         |
|                       | N                            | Lower, M (SE) | Higher, M (SE) | F      | P Value | N     | Lower, M (SE) | Higher, M (SE) | F      | P Value |
| Negative life events  | 1,884                        | 2.71 (0.80)   | 4.08 (0.10)    | 113.49 | 0.000   | —     | —             | —              | —      | —       |
| Early-life trauma     | 1,884                        | 0.35 (0.03)   | 0.56 (0.04)    | 19.84  | 0.000   | 7,703 | 0.29 (0.01)   | 0.39 (0.01)    | 51.02  | 0.000   |
| Neighborhood          | 1,860                        | 2.11 (0.06)   | 2.58 (0.07)    | 25.06  | 0.000   | 7,450 | 7.30 (0.08)   | 8.43 (0.12)    | 60.64  | 0.000   |
| Work                  | 817                          | 5.60 (0.12)   | 6.34 (0.18)    | 11.29  | 0.001   | 2,700 | 3.70 (0.04)   | 3.91 (0.08)    | 6.00   | 0.014   |
| Financial             | 1,880                        | 3.71 (0.12)   | 5.55 (0.16)    | 80.05  | 0.000   | 7,535 | 0.90 (0.01)   | 1.22 (0.02)    | 187.38 | 0.000   |
| Chronic interpersonal |                              |               |                |        |         |       |               |                |        |         |
| Spouse                | 1,498                        | 6.10 (0.14)   | 7.17 (0.19)    | 21.74  | 0.000   | 5,364 | 4.80 (0.06)   | 5.32 (0.08)    | 27.09  | 0.000   |
| Child                 | 1,606                        | 6.55 (0.13)   | 7.18 (0.18)    | 8.06   | 0.005   | 6,910 | 4.03 (0.05)   | 4.74 (0.07)    | 72.40  | 0.000   |
| Extended family       | 1,760                        | 8.11 (0.12)   | 9.00 (0.16)    | 19.87  | 0.000   | 7,203 | 4.34 (0.05)   | 4.96 (0.07)    | 57.81  | 0.000   |
| Friends               | 1,880                        | 6.19 (0.10)   | 7.65 (0.13)    | 29.20  | 0.000   | 7,023 | 3.47 (0.04)   | 3.86 (0.05)    | 35.88  | 0.000   |
| Overall stressors     | 1,870                        | 5.56 (0.06)   | 6.55 (0.08)    | 90.54  | 0.000   | 7,480 | 4.12 (0.03)   | 4.75 (0.04)    | 159.69 | 0.000   |
| Stressor Domains      | Pain Severity                |               |                |        |         |       |               |                |        |         |
|                       | LLLH                         |               |                |        |         | HRS   |               |                |        |         |
|                       | N                            | Lower, M (SE) | Higher, M (SE) | F      | P Value | N     | Lower, M (SE) | Higher, M (SE) | F      | P Value |
| Negative life events  | —                            | —             | —              | —      | —       | —     | —             | —              | —      | —       |
| Early-life trauma     | —                            | —             | —              | —      | —       | 7,703 | 0.31 (0.01)   | 0.40 (0.01)    | 34.12  | 0.000   |
| Neighborhood          | —                            | —             | —              | —      | —       | 7,450 | 7.41 (0.08)   | 8.54 (0.14)    | 50.79  | 0.000   |
| Work                  | —                            | —             | —              | —      | —       | 2,700 | 3.67 (0.04)   | 4.22 (0.09)    | 28.52  | 0.000   |
| Financial             | 685                          | 3.24 (0.20)   | 4.73 (0.25)    | 22.14  | 0.000   | 7,535 | 0.91 (0.01)   | 1.32 (0.02)    | 257.99 | 0.000   |
| Chronic interpersonal |                              |               |                |        |         |       |               |                |        |         |
| Spouse                | 518                          | 5.81 (0.23)   | 6.68 (0.29)    | 5.47   | 0.020   | 5,364 | 4.84 (0.05)   | 5.39 (0.10)    | 24.76  | 0.000   |
| Child                 | 600                          | 6.43 (0.21)   | 7.92 (0.27)    | 18.93  | 0.000   | 6,910 | 4.07 (0.05)   | 4.91 (0.08)    | 82.58  | 0.000   |
| Extended family       | 598                          | 8.70 (0.21)   | 9.48 (0.26)    | 5.44   | 0.020   | 7,203 | 4.39 (0.04)   | 5.04 (0.08)    | 52.36  | 0.000   |
| Friends               | 682                          | 7.13 (0.15)   | 7.95 (0.19)    | 11.97  | 0.001   | 7,023 | 3.52 (0.04)   | 3.85 (0.06)    | 20.47  | 0.000   |
| Overall stressors     | 676                          | 6.30 (0.13)   | 7.34 (0.16)    | 26.23  | 0.000   | 7,484 | 4.17 (0.03)   | 4.85 (0.05)    | 157.63 | 0.000   |
| Stressor Domains      | Pain Interference            |               |                |        |         |       |               |                |        |         |
|                       | LLLH                         |               |                |        |         | HRS   |               |                |        |         |
|                       | N                            | No, M (SE)    | Yes, M (SE)    | F      | P Value | N     | No, M (SE)    | Yes, M (SE)    | F      | P Value |
| Negative life events  | —                            | —             | —              | —      | —       | —     | —             | —              | —      | —       |
| Early-life trauma     | —                            | —             | —              | —      | —       | 7,703 | 0.30 (0.01)   | 0.41 (0.01)    | 45.33  | 0.000   |
| Neighborhood          | —                            | —             | —              | —      | —       | 7,450 | 7.40 (0.08)   | 8.71 (0.15)    | 62.45  | 0.000   |
| Work                  | —                            | —             | —              | —      | —       | 2,700 | 3.68 (0.04)   | 4.23 (0.10)    | 25.81  | 0.000   |
| Financial             | 685                          | 2.92 (0.23)   | 4.55 (0.21)    | 27.44  | 0.000   | 7,535 | 0.91 (0.01)   | 1.35 (0.02)    | 262.32 | 0.000   |
| Chronic interpersonal |                              |               |                |        |         |       |               |                |        |         |
| Spouse                | 518                          | 5.64 (0.27)   | 6.56 (0.25)    | 6.37   | 0.012   | 5,364 | 4.81 (0.05)   | 5.56 (0.10)    | 42.07  | 0.000   |
| Child                 | 600                          | 6.00 (0.25)   | 7.82 (0.22)    | 30.08  | 0.000   | 6,910 | 4.08 (0.05)   | 4.96 (0.09)    | 82.62  | 0.000   |
| Extended family       | 598                          | 8.63 (0.24)   | 9.31 (0.22)    | 4.31   | 0.038   | 7,203 | 4.38 (0.04)   | 5.15 (0.08)    | 67.35  | 0.000   |
| Friends               | 682                          | 6.95 (0.17)   | 7.87 (0.16)    | 15.48  | 0.000   | 7,023 | 3.51 (0.04)   | 3.93 (0.07)    | 29.82  | 0.000   |
| Overall stressors     | 676                          | 6.03 (0.15)   | 7.25 (0.14)    | 38.18  | 0.000   | 7,484 | 4.17 (0.03)   | 4.93 (0.05)    | 180.22 | 0.000   |

For joint, back, headache, and chest pain: No = does not have this or any of the other types of pain; Yes = has this type of pain. For number of painful conditions: lower = 0–1 painful conditions; higher = 2+ painful conditions. For pain severity: lower = no or mild pain; higher = moderate to very severe pain.

LLLH = Longitudinal Late-Life Health study; HRS = Health and Retirement Study.

Table 4 shows the main effects of pain characteristics and gender, as well as the interactions of pain characteristics by gender, on elevations in the overall composite measure of stressors, after statistically adjusting for age and race, in the LLLH and HRS samples. As shown by values under the columns for men and women in the LLLH and HRS samples, with the exception of HRS participants with chest pain, men consistently had higher overall stressor levels than women. These main effects of

gender on overall stressor levels were statistically significant to at least  $P < 0.014$ .

In the LLLH sample, as shown by the rows within types of pain (e.g., joint: no, yes), for both men and women, overall stressors were elevated for those with each type of pain (joint, back, headache, chest), higher number of painful conditions, higher pain severity, and pain interference. All of these main effects of pain on overall stressors were statistically significant at  $P < 0.000$ .

**Table 4.** Stressors overall among men and women by painful condition, pain severity, and pain interference, adjusting for age and race

|                           |        | LLLH  |             |               |             |         |           |         |                            |         |
|---------------------------|--------|-------|-------------|---------------|-------------|---------|-----------|---------|----------------------------|---------|
|                           |        | N     | Men, M (SE) | Women, M (SE) | M.E. Gender |         | M.E. Pain |         | Interaction Gender by Pain |         |
| Pain Characteristics      |        |       |             |               | F           | P Value | F         | P Value | F                          | P Value |
| Joint                     |        | 1,426 |             |               | 13.39       | 0.000   | 46.29     | 0.000   | 0.69                       | 0.41    |
|                           | No     |       | 5.47 (0.12) | 5.12 (0.16)   |             |         |           |         |                            |         |
|                           | Yes    |       | 6.42 (0.10) | 5.86 (0.11)   |             |         |           |         |                            |         |
| Back                      |        | 1,222 |             |               | 14.71       | 0.000   | 55.48     | 0.000   | 1.07                       | 0.30    |
|                           | No     |       | 5.50 (0.12) | 5.14 (0.16)   |             |         |           |         |                            |         |
|                           | Yes    |       | 6.59 (0.11) | 5.96 (0.13)   |             |         |           |         |                            |         |
| Headache                  |        | 808   |             |               | 9.59        | 0.002   | 55.93     | 0.000   | 0.76                       | 0.38    |
|                           | No     |       | 5.50 (0.12) | 5.14 (0.16)   |             |         |           |         |                            |         |
|                           | Yes    |       | 6.84 (0.17) | 6.20 (0.19)   |             |         |           |         |                            |         |
| Chest                     |        | 895   |             |               | 6.04        | 0.014   | 99.44     | 0.000   | 0.03                       | 0.87    |
|                           | No     |       | 5.47 (0.12) | 5.13 (0.16)   |             |         |           |         |                            |         |
|                           | Yes    |       | 7.05 (0.14) | 6.64 (0.20)   |             |         |           |         |                            |         |
| No. of painful conditions |        | 1,870 |             |               |             |         |           |         |                            |         |
|                           | Lower  |       | 5.75 (0.08) | 5.23 (0.11)   | 30.67       | 0.000   | 83.00     | 0.000   | 0.59                       | 0.44    |
|                           | Higher |       | 6.81 (0.11) | 6.13 (0.13)   |             |         |           |         |                            |         |
| Pain severity             |        | 676   |             |               | 10.03       | 0.002   | 25.05     | 0.000   | 0.00                       | 0.96    |
|                           | Lower  |       | 6.56 (0.16) | 5.89 (0.21)   |             |         |           |         |                            |         |
|                           | Higher |       | 7.59 (0.21) | 6.94 (0.25)   |             |         |           |         |                            |         |
| Pain interference         |        | 676   |             |               | 11.72       | 0.001   | 36.81     | 0.000   | 0.11                       | 0.74    |
|                           | No     |       | 6.33 (0.18) | 5.56 (0.25)   |             |         |           |         |                            |         |
|                           | Yes    |       | 7.49 (0.17) | 6.86 (0.21)   |             |         |           |         |                            |         |

|                           |        | HRS   |             |               |             |         |           |         |                            |         |
|---------------------------|--------|-------|-------------|---------------|-------------|---------|-----------|---------|----------------------------|---------|
|                           |        | N     | Men, M (SE) | Women, M (SE) | M.E. Gender |         | M.E. Pain |         | Interaction Gender by Pain |         |
| Pain Characteristics      |        |       |             |               | F           | P Value | F         | P Value | F                          | P Value |
| Joint                     |        | 6,669 |             |               | 18.40       | 0.000   | 108.43    | 0.000   | 2.12                       | 0.145   |
|                           | No     |       | 4.01 (0.06) | 3.79 (0.06)   |             |         |           |         |                            |         |
|                           | Yes    |       | 4.59 (0.05) | 4.43 (0.04)   |             |         |           |         |                            |         |
| Back                      |        | 4,922 |             |               | 10.62       | 0.001   | 137.87    | 0.000   | 3.47                       | 0.063   |
|                           | No     |       | 4.16 (0.06) | 3.86 (0.06)   |             |         |           |         |                            |         |
|                           | Yes    |       | 4.75 (0.06) | 4.66 (0.05)   |             |         |           |         |                            |         |
| Headache                  |        | 2,953 |             |               | 13.06       | 0.000   | 121.05    | 0.000   | 0.26                       | 0.610   |
|                           | No     |       | 4.22 (0.62) | 3.93 (0.61)   |             |         |           |         |                            |         |
|                           | Yes    |       | 5.31 (0.14) | 4.92 (0.87)   |             |         |           |         |                            |         |
| Chest                     |        | 2,611 |             |               | 0.41        | 0.52    | 68.33     | 0.000   | 4.43                       | 0.035   |
|                           | No     |       | 4.18 (0.06) | 3.89 (0.06)   |             |         |           |         |                            |         |
|                           | Yes    |       | 4.85 (0.15) | 5.00 (0.13)   |             |         |           |         |                            |         |
| No. of painful conditions |        | 7,484 |             |               |             |         |           |         |                            |         |
|                           | Lower  |       | 4.25 (0.04) | 4.03 (0.04)   | 11.96       | 0.001   | 146.79    | 0.000   | 0.51                       | 0.476   |
|                           | Higher |       | 4.83 (0.07) | 4.69 (0.05)   |             |         |           |         |                            |         |
| Pain severity             |        | 7,484 |             |               | 15.61       | 0.000   | 153.61    | 0.000   | 1.42                       | 0.233   |
|                           | Lower  |       | 4.26 (0.04) | 4.10 (0.04)   |             |         |           |         |                            |         |
|                           | Higher |       | 5.03 (0.08) | 4.74 (0.06)   |             |         |           |         |                            |         |
| Pain interference         |        | 7,484 |             |               | 8.57        | 0.003   | 164.05    | 0.000   | 0.09                       | 0.765   |
|                           | No     |       | 4.28 (0.04) | 4.09 (0.04)   |             |         |           |         |                            |         |
|                           | Yes    |       | 5.02 (0.09) | 4.86 (0.06)   |             |         |           |         |                            |         |

For joint, back, headache, and chest pain: No = does not have this or any of the other types of pain; Yes = has this type of pain. For number of painful conditions: lower = 0–1 painful conditions; higher = 2+ painful conditions. For pain severity: lower = no or mild pain; higher = moderate to very severe pain.

LLLH = Longitudinal Late-Life Health study; HRS = Health and Retirement Study.

In the LLLH samples, mean values showed a pattern in which overall stressors were lowest among women having little or no pain and highest among men reporting painful conditions, more numerous painful conditions, more severe pain, and pain interference, but there were no statistically significant interactions between gender

and pain on overall stressor levels. As shown in the bottom section of Table 4, almost all of the main and interaction effects found in the HRS sample reproduced those found in the LLLH sample.

Table 6 summarizes the results of subsidiary analyses to determine the interactions of pain and gender on



stressors within each of the nine separate stressor domains. As shown in the top half of the table, all of the types of pain, and number of painful conditions, interacted with gender to predict stressors in five of the nine specific stressor domains. Having painful conditions was associated with higher elevations in negative life events, financial stressors, and spouse stressors for women compared with men. In contrast, they were associated with higher elevations in friend stressors for men than for women. Whereas back pain was linked to higher levels of work stressors among men compared with women, chest pain was associated with elevated work stressors among women compared with men.

### Pain Characteristics, Race, and Stressor Elevations

In the LLLH sample, nonwhites were somewhat more likely than whites to have joint, back, headache, and chest pain: 52% vs 48%, 44% vs 37%, 23% vs 15%, and 22% vs 20%, respectively. Nonwhites also were more likely to have two or more painful conditions (46% vs 36%), to have higher levels of pain severity (49% vs 39%), and to report that pain interfered with their daily activities and sleep (64% vs 55%). These group differences were statistically significant for back and headache pain and number of painful conditions ( $\chi^2 = 3.82$ ,  $P < 0.05$ ;  $\chi^2 = 7.20$ ,  $P < 0.01$ ; and  $\chi^2 = 6.68$ ,  $P < 0.01$ , respectively).

These findings were partially reproduced in the HRS sample. In the HRS sample, there were no differences between nonwhites and whites in prevalence of joint pain, back pain, number of painful conditions, or higher pain severity (about 60%, 37%, 34%, and 24%, respectively, in both groups). However, nonwhites were more likely to report headache (12% vs 10%), chest pain (7% vs 6%), and pain interference (24% vs 21%); the differences for headache pain and pain interference reached statistical significance ( $\chi^2 = 7.32$ ,  $P < 0.01$ ; and  $\chi^2 = 3.35$ ,  $P < 0.05$ , respectively).

Table 5 describes the effects of pain characteristics, race, and their interaction, on the composite measure of overall stressors, after statistically adjusting for age and gender, in the LLLH and HRS samples. In the LLLH sample, consistently across types of pain, number of painful conditions, pain severity, and pain interference, nonwhite participants had higher overall stressor levels than white participants. This finding was reproduced in the HRS sample.

In both samples, the lowest stressor levels were found among whites with little or no pain, and the highest stressor levels occurred among nonwhites who affirmed joint, back, headache, and chest pain and those with more numerous painful conditions, more severe pain, and pain interference. Only back pain, in interaction with nonwhite race, was statistically significant at  $P < 0.05$ .

Subsidiary analyses revealed that some statistically significant interactions between pain and race predict stressor elevations in specific life domains: Back pain, headache, and chest pain were associated with especially elevated stressors in the domains of finances, neighborhood, and extended family for nonwhite participants with pain.

### Discussion

Almost no research has focused on social determinants of pain, though recent studies have demonstrated associations between social environmental factors, such as early-life trauma, financial hardship, disordered neighborhoods, and problematic work conditions, and poorer pain outcomes, including the development of musculoskeletal, chronic, and debilitating pain and slower recovery from painful injuries [12,17–27]. However, none of these investigations has conceptualized the adverse social and physical environmental circumstances in their studies as “stressors,” examined stressors across a variety of life domains, or focused on the relationship between pain and stressors among older adults.

Consistent with research on the sociology of health, showing positive associations between stressors and negative health outcomes across a range of major medical conditions and symptoms [29,32–34], this investigation demonstrated elevations in stressors across multiple life domains among older adults with pain. Compared with older adults without joint, back, headache, or chest pain, older adults with these conditions had elevated stressors in all of the life domains we examined: negative life events, early-life trauma, work, finances, spouse, children, extended family, and friends, and in overall stressors. Moreover, older adults with more numerous painful conditions, more severe pain, and pain that interfered with daily activities and sleep also experienced stressor elevations in all of these life domains. Almost all of these findings reproduced across two large community samples, lending strength to the conclusion that pain and stressors are linked in later life.

However, because the data were cross-sectional, the direction of causality in this association is unknown. On one hand, the positive associations found here may reflect the negative impacts of older adults' pain on their social contexts [65]. On the other, they may indicate that stressors influence the development and maintenance of late-life pain. Likely the effects are reciprocal and perhaps, temporally, tightly bound. In this regard, physical pain and social pain have been shown to share common neural substrates [66,67]; this may help explain why people with more exposure to early-life trauma have more physical pain later in life [68,69]. This commonality may also account for simultaneous elevations in people's physical pain and their perceptions of elevated stressors, especially in the domains of interpersonal stressors involving family and friends. Further longitudinal research

**Table 5.** Stressors overall among white and nonwhite participants by painful condition, pain severity, and pain interference, adjusting for age and gender

|                           |        | LLH   |               |                  |           |         |           |         |                          |         |
|---------------------------|--------|-------|---------------|------------------|-----------|---------|-----------|---------|--------------------------|---------|
|                           |        | N     | White, M (SD) | Nonwhite, M (SD) | M.E. Race |         | M.E. Pain |         | Interaction Race by Pain |         |
| Pain Characteristics      |        |       |               |                  | F         | P Value | F         | P Value | F                        | P Value |
| Joint                     |        | 1,426 |               |                  | 11.62     | 0.001   | 17.71     | 0.000   | 0.20                     | 0.660   |
|                           | No     |       | 5.27 (0.10)   | 5.94 (0.37)      |           |         |           |         |                          |         |
|                           | Yes    |       | 6.12 (0.08)   | 6.99 (0.23)      |           |         |           |         |                          |         |
| Back                      |        | 1,222 |               |                  | 23.89     | 0.000   | 36.68     | 0.000   | 4.25                     | 0.039   |
|                           | No     |       | 5.28 (0.10)   | 5.93 (0.36)      |           |         |           |         |                          |         |
|                           | Yes    |       | 6.20 (0.09)   | 7.99 (0.25)      |           |         |           |         |                          |         |
| Headache                  |        | 808   |               |                  | 10.60     | 0.001   | 27.84     | 0.000   | 0.58                     | 0.450   |
|                           | No     |       | 5.29 (0.10)   | 5.95 (0.36)      |           |         |           |         |                          |         |
|                           | Yes    |       | 6.48 (0.14)   | 7.54 (0.34)      |           |         |           |         |                          |         |
| Chest                     |        | 895   |               |                  | 8.73      | 0.003   | 38.87     | 0.000   | 0.22                     | 0.640   |
|                           | No     |       | 5.29 (0.10)   | 5.96 (0.37)      |           |         |           |         |                          |         |
|                           | Yes    |       | 6.83 (0.12)   | 7.75 (0.36)      |           |         |           |         |                          |         |
| No. of painful conditions |        | 1,870 |               |                  |           |         |           |         |                          |         |
|                           | Lower  |       | 5.49 (0.07)   | 6.12 (0.22)      | 30.00     | 0.000   | 52.03     | 0.000   | 3.51                     | 0.061   |
|                           | Higher |       | 6.42 (0.09)   | 7.71 (0.25)      |           |         |           |         |                          |         |
| Pain severity             |        | 676   |               |                  | 5.96      | 0.015   | 7.82      | 0.005   | 0.00                     | 0.999   |
|                           | Lower  |       | 6.23 (0.13)   | 7.15 (0.51)      |           |         |           |         |                          |         |
|                           | Higher |       | 7.27 (0.17)   | 8.18 (0.51)      |           |         |           |         |                          |         |
| Pain interference         |        | 676   |               |                  | 6.15      | 0.013   | 8.10      | 0.005   | 0.17                     | 0.680   |
|                           | No     |       | 5.95 (0.15)   | 7.06 (0.59)      |           |         |           |         |                          |         |
|                           | Yes    |       | 7.19 (0.14)   | 7.99 (0.44)      |           |         |           |         |                          |         |

|                           |        | HRS   |               |                  |           |         |           |         |                          |         |
|---------------------------|--------|-------|---------------|------------------|-----------|---------|-----------|---------|--------------------------|---------|
|                           |        | N     | White, M (SE) | Nonwhite, M (SE) | M.E. Race |         | M.E. Pain |         | Interaction Race by Pain |         |
| Pain Characteristics      |        |       |               |                  | F         | P Value | F         | P Value | F                        | P Value |
| Joint                     |        | 6,669 |               |                  | 166.05    | 0.000   | 82.75     | 0.000   | 2.47                     | 0.120   |
|                           | No     |       | 3.79 (0.05)   | 4.58 (0.11)      |           |         |           |         |                          |         |
|                           | Yes    |       | 4.33 (0.03)   | 5.34 (0.07)      |           |         |           |         |                          |         |
| Back                      |        | 5,922 |               |                  | 142.89    | 0.000   | 102.94    | 0.000   | 2.73                     | 0.100   |
|                           | No     |       | 3.86 (0.05)   | 4.66 (0.11)      |           |         |           |         |                          |         |
|                           | Yes    |       | 4.52 (0.04)   | 5.58 (0.10)      |           |         |           |         |                          |         |
| Headache                  |        | 2,953 |               |                  | 88.10     | 0.000   | 109.14    | 0.000   | 3.56                     | 0.059   |
|                           | No     |       | 3.91 (0.05)   | 4.73 (0.11)      |           |         |           |         |                          |         |
|                           | Yes    |       | 4.85 (0.08)   | 6.08 (0.16)      |           |         |           |         |                          |         |
| Chest                     |        | 2,611 |               |                  | 59.70     | 0.000   | 59.88     | 0.000   | 2.82                     | 0.093   |
|                           | No     |       | 3.89 (0.05)   | 4.71 (0.10)      |           |         |           |         |                          |         |
|                           | Yes    |       | 4.72 (0.11)   | 5.98 (0.22)      |           |         |           |         |                          |         |
| No. of painful conditions |        | 7,484 |               |                  |           |         |           |         |                          |         |
|                           | Lower  |       | 3.98 (0.03)   | 4.83 (0.07)      | 224.49    | 0.000   | 119.95    | 0.000   | 4.65                     | 0.031   |
|                           | Higher |       | 4.56 (0.04)   | 5.69 (0.10)      |           |         |           |         |                          |         |
| Pain severity             |        | 7,484 |               |                  | 170.43    | 0.000   | 89.66     | 0.000   | 0.00                     | 0.990   |
|                           | Lower  |       | 4.01 (0.03)   | 4.95 (0.07)      |           |         |           |         |                          |         |
|                           | Higher |       | 4.69 (0.05)   | 5.64 (0.11)      |           |         |           |         |                          |         |
| Pain interference         |        | 7,484 |               |                  | 157.67    | 0.000   | 104.54    | 0.000   | 0.01                     | 0.930   |
|                           | No     |       | 4.01 (0.03)   | 4.95 (0.07)      |           |         |           |         |                          |         |
|                           | Yes    |       | 4.77 (0.06)   | 5.70 (0.12)      |           |         |           |         |                          |         |

For joint, back, headache, and chest pain: No = does not have this or any of the other types of pain; Yes = has this type of pain. For number of painful conditions: lower = 0–1 painful conditions; higher = 2+ painful conditions. For pain severity: lower = no or mild pain; higher = moderate to very severe pain.

LLLH = Longitudinal Late-Life Health study; HRS = Health and Retirement Study.

is needed to address the causal direction of relationships between life stressors and pain among older adults.

Notably, the stressor elevations found among older adults with pain were relatively modest. Compared with biological and psychological determinants of pain, stressful environmental circumstances may have weaker and

less direct associations with older adults' pain. Further research should be aimed at understanding the indirect pathways, via key physiological and psychological processes, through which stressful life circumstances result in adverse pain outcomes for older adults. For example, physiological and psychological reactivity to stressors,

**Table 6.** Summary of interactions of pain with gender and race, within specific stressor domains, in the LLLH and HRS samples

| Stressor Elevations by Pain Characteristics and Gender |                                   |                                       |            |              |               |                                         |         |
|--------------------------------------------------------|-----------------------------------|---------------------------------------|------------|--------------|---------------|-----------------------------------------|---------|
| Pain Characteristics                                   | Stressor Domain                   | Mean Stressors in Pain, Gender Groups |            |              |               | Interaction Gender by Pain <sup>‡</sup> |         |
|                                                        |                                   | No, Men                               | Yes, Men   | No, Women    | Yes, Women    | F                                       | P Value |
| Joint                                                  | Finances*                         | 0.81                                  | 0.99       | 0.82         | 1.13          | 7.38                                    | 0.007   |
| Back                                                   | Negative life events <sup>†</sup> | 2.14                                  | 3.38       | 2.12         | 4.20          | 7.01                                    | 0.008   |
|                                                        | Work <sup>†</sup>                 | 5.21                                  | 6.52       | 5.36         | 5.60          | 4.65                                    | 0.031   |
|                                                        | Finances*                         | 0.85                                  | 1.01       | 0.85         | 1.26          | 7.98                                    | 0.005   |
| Headache                                               | Friends <sup>†</sup>              | 7.16                                  | 8.23       | 6.04         | 6.27          | 4.58                                    | 0.033   |
|                                                        | Friends <sup>†</sup>              | 7.14                                  | 8.48       | 6.06         | 6.29          | 4.75                                    | 0.030   |
| Chest                                                  | Negative life events <sup>†</sup> | 2.13                                  | 4.21       | 2.11         | 5.71          | 16.60                                   | 0.000   |
|                                                        | Work*                             | 3.87                                  | 3.63       | 3.50         | 4.23          | 4.40                                    | 0.036   |
|                                                        | Finances*                         | 0.56                                  | 1.21       | 0.87         | 1.53          | 9.71                                    | 0.002   |
|                                                        | Spouse*                           | 4.41                                  | 4.76       | 4.89         | 6.28          | 5.74                                    | 0.017   |
| No. of painful conditions                              | Finances*                         | 0.87                                  | 1.12       | 0.92         | 1.28          | 4.88                                    | 0.027   |
| Stressor Elevations by Pain Characteristics and Race   |                                   |                                       |            |              |               |                                         |         |
| Pain Characteristics                                   | Stressor Domain                   | Mean Stressors in Pain, Race Group    |            |              |               | Interaction Race by Pain <sup>§</sup>   |         |
|                                                        |                                   | No, White                             | Yes, White | No, Nonwhite | Yes, Nonwhite | F                                       | P Value |
| Back                                                   | Finances <sup>†</sup>             | 3.20                                  | 4.60       | 4.86         | 8.71          | 7.28                                    | 0.007   |
| Headache                                               | Neighborhood*                     | 6.27                                  | 8.06       | 9.53         | 12.65         | 4.73                                    | 0.030   |
| Chest                                                  | Extended family*                  | 4.32                                  | 4.75       | 4.29         | 5.85          | 6.74                                    | 0.010   |

For joint, back, headache, and chest pain: No = does not have this or any of the other types of pain; Yes = has this type of pain. For No. of painful conditions: no = 0 or 1; yes = 2 or more.

\*HRS sample is the source of the interaction effect.

<sup>†</sup>LLLH sample is the source of the interaction effect.

<sup>‡</sup>These interaction effects adjusted for age and race.

<sup>§</sup>These interaction effects adjusted for age and gender.

including inflammatory, immunologic, emotional, and cognitive responses to stressors, may mediate relationships between older adults' stressors and their pain outcomes. Similarly, future research should focus on identification of the key moderating factors that account for variation in the strength of the relationship between late-life stressors and pain. For instance, some research has shown that sense of control is a key moderator of the impacts of older adults' stressors on their levels of depressive symptoms and cognitive function [70,71]. Research on these mediating and moderating factors can lead to discovery of factors that can be modified to help prevent or minimize the effects of late-life stressors on older adults' pain outcomes.

As predicted, in both the LLLH and HRS samples there were gender and race disparities in the distributions of pain and stressors. Consistent with previous findings from mixed-age and older samples [39–43], older women generally exceeded older men in prevalence of painful conditions, number of painful conditions, pain severity, and pain interference. Several biological and psychological mechanisms may help explain these differences, including, at the biological level, hormonal, cortical processing and endogenous opioid system differences between women and men and, at the psychological level, gender differences in pain coping strategies, catastrophizing, and adoption of stereotypic gender roles [39,42].

Across all categories of pain, overall stressors were higher for men than women. However, certain types of pain (joint, back, chest, more numerous painful conditions) were associated with especially pronounced stressor elevations for women, but only in certain stressor domains (negative life events, finances, work, spouse); for men, back and headache pain were associated with especially strong stressor elevations in the domains of work and friends. This is only partly consistent with previous findings suggesting that whereas women have more stressors in social domains, such as relationships with family and friends, men have more in the domains of work and finances [36,37,47]. However, it is consistent with the observation that whatever gender differences there are in stressor exposures and in associations between health-related variables and stressors, they appear to vary by specific stressor domain [48].

Past studies have yielded inconsistent findings regarding race differences in pain prevalence, intensity, and interference [44–46]. This study demonstrated a higher prevalence of painful conditions, more numerous painful conditions, higher pain severity, and more pain interference among nonwhite than white older adults. Similar to findings reported by Stenthal and colleagues [38], nonwhite older adults also consistently reported higher elevations in stressors across each of the individual stressor domains. For older nonwhite adults, back pain, headache, and chest pain appear associated with especially

pronounced elevations in stressors in the domains of finances, neighborhood, and extended family. Taken together, these results suggest a need for further research on gender- and race-related disparities in the distributions of, and connections between, late-life pain and stressors, focusing on their manifestations within specific domains of pain and stressors.

This study has several limitations. Foremost, its cross-sectional design precludes inferences about the direction of causality between older adults' pain and stressors. Also, the results describe pain and stressors among mainly white, "younger old" community residents; it is not known how they generalize to specific minority race and ethnic groups and to "older old" and institutionalized older adults. This investigation's pain measures had limitations. For example, although the presence of back pain was assessed, no information was obtained about the frequency, severity, or chronicity of a participant's back pain.

Notwithstanding its limitations, this study has several strengths. It was comprised of two large samples of older community residents assessed with established measures of pain and life stressors. Because these measures were identical or very similar in the two samples, they could be harmonized, then used to establish the reproducibility of relationships found in the samples. As yet there is no consensus on the best methods to judge successful reproduction of study results [72], but according to one criterion established by the Open Science Collaboration [73], shared statistical significance of effects, this investigation clearly demonstrated substantial overlap between findings obtained in the LLLH and HRS samples.

This study also provides preliminary evidence, and points the way toward future research, that may eventually translate to clinical and public health practices to prevent and modify associations between late-life stressors and pain. For example, screening procedures might be employed to identify older adults whose stressors and demographic and psychosocial characteristics put them at elevated risk of poorer pain outcomes. Interventions targeting key mediators and moderators of the pain–stressor relationship, such as physiological and cognitive responses to stressors and sense of control, might be developed to diminish associations between late-life stressors and pain.

In conclusion, this study adds significantly to the body of pain research that highlights the importance of the social component of the biopsychosocial model for furthering knowledge of the etiology, consequences, and prevention of pain. It extends earlier research by demonstrating connections between older adults' pain and stressor elevations, gender- and race-related disparities in these elevations, and the domain specificity with which pain and gender, and pain and race, interact to predict stressor elevations. Finally, this investigation maps out future research directions toward the eventual development of clinical and public health interventions aimed at disrupting links between stressors and pain in later life.

## Acknowledgments

I am grateful to Sonya SooHoo for her assistance developing the data files used in this investigation and for her help with manuscript preparation.

## References

1. Scudds R, Ostby T. Pain and pain-related interference with function in older Canadians: The Canadian Study of Health and Aging. *Disabil Rehabil* 2001;23(15):654–64.
2. Thomas E, Peat G, Harris L, Wilkie R, Croft PR. The prevalence of pain and pain interference in a general population of older adults: Cross-sectional findings from the North Staffordshire Osteoarthritis Project (NorStOP). *Pain* 2004;110:361–8.
3. Brattberg G, Parker MG, Thorslund M. The prevalence of pain among the oldest old in Sweden. *Pain* 1996;67(1):29–34.
4. Brochet B, Michel P, Barberger-Gateau P, Dartigues J. Population-based study of pain in elderly people: A descriptive survey. *Age Ageing* 1998;27(3):279–84.
5. Mobily PR, Herr KA, Clark MK, Wallace RB. An epidemiologic analysis of pain in the elderly. *J Aging Health* 1994;6(2):139–54.
6. Abdulla A, Adams N, Bone M, et al. Guidance on the management of pain in older people. *Age Ageing* 2013;42:i1–57.
7. Ahacic K, Kareholt I. Prevalence of musculoskeletal pain the general Swedish population from 1968 to 2002: Age, period, and cohort patterns. *Pain* 2010;151(1):206–14.
8. Fayaz A, Croft P, Langford RM, Donaldson LJ, Jones GT. Prevalence of chronic pain in the UK: A systematic review and meta-analysis of population studies. *BMJ Open* 2016;6(6):e010364.
9. American Geriatrics Society Panel on the Pharmacological Management of Persistent Pain in Older Persons. Pharmacological management of persistent pain in older persons. *J Am Geriatr Soc* 2009;57:1331–46.
10. Institute of Medicine Committee on Advancing Pain Research, Care, and Education. *Relieving Pain in America: A Blueprint for Transforming Prevention, Care, Education, and Research*. Washington, DC: National Academies Press; 2011.
11. Briggs AM, Cross MJ, Hoy DG, et al. Musculoskeletal health conditions represent a global threat to healthy aging: A report for the 2015 World Health Organization world report on ageing and health. *Gerontologist* 2016;56(Suppl 2):S243–55.
12. Edwards RR, Dworkin RH, Sullivan MD, Turk DC, Wasan AD. The role of psychosocial processes in the development and maintenance of chronic pain. *J Pain* 2016;17(9):T70–92.
13. Gagliese L. Pain and aging: The emergence of a new subfield of pain research. *J Pain* 2009;10(4):343–53.
14. Gatchel RJ, Peng YB, Peters ML, Fuchs PN, Turk DC. The biopsychosocial approach to chronic pain: Scientific advances and future directions. *Psychol Bull* 2007;133(4):581–624.
15. Turk DC, Fillingim RB, Ohrbach R, Patel KV. Assessment of psychosocial and functional impact of chronic pain. *J Pain* 2016;17(9):T21–49.
16. Froud R, Patterson S, Eldridge S, et al. A systematic review and meta-synthesis of the impact of low back pain on people's lives. *BMC Musculoskelet Disord* 2014;15:50.
17. Pincus T, Kent P, Bronfort G, Loisel P, Pransky G, Hartvigsen J. Twenty-five years with the biopsychosocial model of low back pain—is it time to celebrate? A report from the Twelfth International Forum for Primary Care Research on Low Back Pain. *Spine* 2013;38(24):2118–23.

18. Afari N, Ahumada SM, Wright LJ, et al. Psychological trauma and functional somatic syndromes: A systematic review and meta-analysis. *Psychosom Med* 2014;76(1):2–11.
19. Brennstuhl MJ, Tarquinio C, Montel S. Chronic pain and PTSD: Evolving views on their comorbidity. *Perspect Psychiatr Care* 2015;51(4):295–304.
20. Jones GT, Power C, Macfarlane GJ. Adverse events in childhood and chronic widespread pain in adult life: Results from the 1958 British Birth Cohort Study. *Pain* 2009;143(1–2):92–6.
21. Kopec JA, Sayre EC. Traumatic experiences in childhood and the risk of arthritis: A prospective cohort study. *Can J Public Health* 2004;95(5):361–5.
22. Kopec JA, Sayre EC. Stressful experiences in childhood and chronic back pain in the general population. *Clin J Pain* 2005;21(6):478–83.
23. Borsook D, Youssef AM, Simons L, Elman I, Eccleston C. When pain gets stuck: The evolution of pain chronification and treatment resistance. *Pain* 2018;159(12):2421–36.
24. Ulirsch JC, Weaver MA, Bortsov AV, et al. No man is an island: Living in a disadvantaged neighborhood influences chronic pain development after motor vehicle collision. *Pain* 2014;155:2116–23.
25. Jensen MP, Moore MR, Bockow TB, Ehde DM, Engel JM. Psychosocial factors and adjustment to chronic pain in persons with physical disabilities: A systematic review. *Arch of Phys Med and Rehabil* 2011;92(1):146–60.
26. Helmhout PH, Staal JB, Heymans MW, Harts CC, Hendriks EJ, de Bie RA. Prognostic factors for perceived recovery or functional improvement in non-specific low back pain: Secondary analyses of three randomized clinical trials. *Eur Spine J* 2010;19(4):650–9.
27. Melloh M, Elfering A, Chapple CM, et al. Prognostic occupational factors for persistent low back pain in primary care. *Int Arch Occup Environ Health* 2013;86(3):261–9.
28. Buscemi V, Chang WJ, Liston MB, McAuley JH, Schabrun SM. The role of perceived stress and life stressors in the development of chronic musculoskeletal pain disorders: A systematic review. *J Pain* 2019;20(10):1127–39.
29. Crosswell AD, Suresh M, Puteman E, Gruenewald TL, Lee J, Epel ES. Advancing research on psychosocial stress and aging with the Health and Retirement Study: Looking back to launch the field forward. *J Gerontol B Psychol Sci Soc Sci* 2020;75(5):970–80.
30. Lazarus R, Folkman S. Coping and adaptation. In: Gentry WD, ed. *The Handbook of Behavioral Medicine*. New York: The Guilford Press; 1984:282–325.
31. Wheaton B, Young M, Montazer S, Stuart-Lahman K. Social stress in the twenty-first century. In: Aneshensel AS, Phelan JC, Bierman A, eds. *Handbook of the Sociology of Mental Health*. Dordrecht, the Netherlands: Springer Netherlands; 2013:299–323.
32. McEwan BS. Stress, adaptation, and disease: Allostasis and allostatic load. *Ann N Y Acad Sci* 1998;840:33–44.
33. Slavich GM. Life stress and health: A review of conceptual issues and recent findings. *Teach Psychol* 2016;43(4):346–55.
34. Thoits PA. Stress and health: Major findings and policy implications. *J Health Soc Behav* 2010;51(1 Suppl):S41–53.
35. Turner RJ, Avison WR. Status variations in stress exposure: Implications for the interpretation of research on race, socioeconomic status, and gender. *J Health Soc Behav* 2003;44(4):488–505.
36. McLeod GF, Horwood LJ, Fergusson DM, Boden JM. Life-stress and reactivity by gender in a longitudinal birth cohort at 30 and 35 years. *Soc Psychiatry Psychiatr Epidemiol* 2016;51(10):1385–94.
37. McDonough P, Walters V. Gender and health: Reassessing patterns and explanations. *Soc Sci Med* 2001;52(4):547–59.
38. Sternthal MJ, Slopen N, Williams DR. Racial disparities in health: How much does stress really matter? *Du Bois Rev* 2011;8(1):95–113.
39. Bartley EJ, Fillingim RB. Sex differences in pain: A brief review of clinical and experimental findings. *Br J Anaesth* 2013;111(1):52–8.
40. Cimas M, Ayala A, Sanz B, Agulló-Tomás MS, Escobar A, Forjaz MJ. Chronic musculoskeletal pain in European older adults: Cross-national and gender differences. *Eur J Pain* 2018;22(2):333–45.
41. Eslami V, Katz MJ, White RS, et al. Pain intensity and pain interference in older adults: Role of gender, obesity and high-sensitivity C-reactive protein. *Gerontology* 2017;63(1):3–12.
42. Fillingim RB. Individual differences in pain: Understanding the mosaic that makes pain personal. *Pain* 2017;158:S11–8.
43. Leveille SG, Zhang Y, McMullen W, Kelly-Hayes M, Felson DT. Sex differences in musculoskeletal pain in older adults. *Pain* 2005;116(3):332–8.
44. Dahlhamer J, Lucas J, Zelaya C, et al. Prevalence of chronic pain and high-impact chronic pain among adults—United States, 2016. *Morb Mortal Wkly Rep* 2018;67(36):1001–6.
45. Edwards CL, Fillingim RB, Keefe F. Race, ethnicity and pain. *Pain* 2001;94(2):133–7.
46. Nahin RL. Estimates of pain prevalence and severity in adults: United States, 2012. *J Pain* 2015;16(8):769–80.
47. Hatch SL, Dohrenwend BP. Distribution of traumatic and other stressful life events by race/ethnicity, gender, SES and age: A review of the research. *Am J Community Psychol* 2007;40(3–4):313–32.
48. Aneshensel CS. Social stress: Theory and research. *An Rev Soc* 1992;18(1):15–38.
49. Kessler RC. A strategy for studying differential vulnerability to the psychological consequences of stress. *J Health Soc Beh* 1979;20(2):100–8.
50. Kessler RC, McLeod JD. Sex differences in vulnerability to undesirable life events. *Am Sociol Rev* 1984;49(5):620–31.
51. Turner RJ, Avison WR. Gender and depression: Assessing exposure and vulnerability to life events in a chronically strained population. *J Nerv Ment Dis* 1989;177:443–55.
52. Brennan PL, Moos RH. Life stressors, social resources, and late-life problem drinking. *Psychol Aging* 1990;5(4):491–501.
53. Moos RH, Brennan PL, Fondacaro MR, Moos BS. Approach and avoidance coping responses among older problem and non-problem drinkers. *Psychol Aging* 1990;5(1):31–40.
54. Health and Retirement Study. Available at: <http://hrsonline.isr.umich.edu> (accessed November 2019).
55. Servais M. Overview of HRS Public Data Files for Cross-Sectional and Longitudinal Analysis. Ann Arbor, MI: Survey Research Center Institute for Social Research, University of Michigan; 2010. Available at: <https://hrs.isr.umich.edu/documentation/user-guides> (accessed November 2019).
56. Sonnega A. The Health and Retirement Study: An Introduction. Ann Arbor, MI: Survey Research Center Institute for Social Research, University of Michigan; 2015. Available at: <https://hrs.isr.umich.edu/documentation/user-guides> (accessed November 2019).
57. Smith J, Ryan LH, Fisher GG, Sonnega A, Weir DR. HRS Psychosocial and Lifestyle Questionnaire, 2006–2016. Ann Arbor, MI: Survey Research Center Institute for Social Research, University of Michigan; 2017. Available at: <https://hrs.isr.umich.edu/documentation/user-guides> (accessed November 2019).
58. Ware JE, Kosinski M Jr, Gandek B, et al. The factor structure of the SF-36 Health Survey in 10 countries: Results from the IQOLA Project. *J Clin Epidemiol* 1998;51(11):1159–65.



59. Moos R, Moos B. Life Stressors and Social Resources Inventory: Adult Form Manual. Odessa, FL: Psychological Assessment Resources; 1994.
60. Moos RH. Life Stressors and Social Resources Inventory & Coping Responses Inventory: Annotated Bibliography. 2nd ed. Stanford, CA: Department of Psychiatry and Behavioral Sciences, Stanford University; 2011. Available at: [http://www.parinc.com/WebUploads/samplerpts/LISRES\\_CRI\\_bib\\_2.pdf](http://www.parinc.com/WebUploads/samplerpts/LISRES_CRI_bib_2.pdf) (accessed November 2019).
61. Lemke S, Brennan PL, Schutte KK, Moos RH. Upward pressures on drinking: Exposure and reactivity in adulthood. *J Stud Alcohol Drugs* 2007;68(3):437–45.
62. Krause N, Shaw BA, Cairney J. A descriptive epidemiology of lifetime trauma and the physical health status of older adults. *Psychol Aging* 2004;19(4):637–48.
63. Mendes de Leon CF, Cagney KA, Bienias JL, et al. Neighborhood social cohesion and disorder in relation to walking in community-dwelling older adults: A multilevel analysis. *J Aging Health* 2009;21(1):155–71.
64. Campbell A, Converse PE, Rodgers WL. The Quality of American Life: Perceptions, Evaluations, and Satisfaction. New York: Russell Sage Foundation; 1976.
65. Duenas M, Ojeda B, Salazar A, Mico JA, Failde I. A review of chronic pain impact on patients, their social environment and the health care system. *J Pain Res* 2016;9:457–67.
66. Eisenberger NI. Social pain and the brain: Controversies, questions, and where to go from here. *Annu Rev Psychol* 2015;66(1):601–29.
67. Tchalova K, Eisenberger NI. How the brain feels the hurt of heartbreak: Examining the neurological overlap between social and physical pain. In: Toga AW, ed. *Brain Mapping: and Encyclopedic Reference*. Vol. 3. New York: Elsevier; 2015:15–20.
68. Brown RJ, Schrag A, Trimble MR. Dissociation, childhood interpersonal trauma, and family functioning in patients with somatization disorder. *Am J Psychiatry* 2005;162(5):899–905.
69. Landa A, Peterson BS, Fallon BA. Somatoform pain: A developmental theory and translational research review. *Psychosom Med* 2012;74(7):717–27.
70. Infurna FJ, Mayer A. The effects of constraints and mastery on mental and physical health: Conceptual and methodological considerations. *Psychol Aging* 2015;30(2):432–48.
71. Lachman ME, Neupert SD, Agrigoroaei S. The relevance of control beliefs for health and aging. In: Schaie KW, Willis SL, eds. *Handbook of the Psychology of Aging*. San Diego, CA: Academic Press; 2011:175–90.
72. Goodman SN, Fanelli D, Ioannidis JP. What does research reproducibility mean? *Sci Transl Med* 2016;8(341):341ps12.
73. Open Science Collaboration. Estimating the reproducibility of psychological science. *Science* 2015;349:aac4716.
